# Supplementary material for: Effects of lifestyle intervention in BRCA1/2 mutation carriers on nutrition, BMI, and physical fitness (LIBRE study): study protocol for a randomized controlled trial
Source: PubMed Central journal article supplement (PMC4966818; doi:10.1186/s13063-016-1504-0), 2016-07-29
Supplement: 13063_2016_1504_MOESM2_ESM.pdf [file 13063_2016_1504_MOESM2_ESM.pdf]

## SPIRIT Flow Diagram of the LIBRE Study

| TIMEPOINT*                                                                                  | Enrolment | Start                          |             |     |     |              |              | Close-out    | Follow up |
|---------------------------------------------------------------------------------------------|-----------|--------------------------------|-------------|-----|-----|--------------|--------------|--------------|-----------|
|                                                                                             | SE        | V0                             | V1<br>(3Mo) | 6Mo | 9Mo | V2<br>(12Mo) | V3<br>(24Mo) | V4<br>(36Mo) | +12Mo     |
| <b>ENROLMENT:</b>                                                                           |           |                                |             |     |     |              |              |              |           |
| Eligibility screen                                                                          | X         |                                |             |     |     |              |              |              |           |
| Informed consent                                                                            | X         |                                |             |     |     |              |              |              |           |
| Randomisation                                                                               | X         |                                |             |     |     |              |              |              |           |
| <b>INTERVENTIONS:</b>                                                                       |           |                                |             |     |     |              |              |              |           |
| <i>[Intervention group "I"]</i>                                                             | X         | ← Intervention phase V0 – V2 → |             |     |     |              | X            | X            | X         |
| <i>[control group "C"]</i>                                                                  | X         | X                              | X           | X   | X   | X            | X            | X            | X         |
| <b>ASSESSMENTS:</b>                                                                         |           |                                |             |     |     |              |              |              |           |
| <i>Clinical Baseline</i>                                                                    | C+I       |                                |             |     |     |              |              |              |           |
| <i>Clinical follow up</i>                                                                   |           |                                |             |     |     | C+I          | C+I          | C+I          | C+I       |
| <i>Spiroergometry</i>                                                                       | C+I       |                                | C+I         |     |     | C+I          | C+I          | C+I          |           |
| <i>Accelerometry</i>                                                                        | C+I       |                                | C+I         | C+I | C+I | C+I          |              |              |           |
| <i>Questionnaire "training" (IPAQ-L)</i>                                                    |           | C+I                            | C+I         | C+I | C+I | C+I          | C+I          | C+I          |           |
| <i>Questionnaires "nutrition"</i>                                                           | C+I       |                                | C+I         |     |     | C+I          | C+I          | C+I          |           |
| <i>Lab</i>                                                                                  | C+I       |                                | C+I         |     |     | C+I          | C+I          | C+I          |           |
| <i>Clinical examination</i>                                                                 | C+I       |                                | C+I         |     |     | C+I          | C+I          | C+I          |           |
| <i>Anthropometry "Psychological" questionnaires (EORTC QLQ-C30/BR23, TICS, BKAE, LOT-R)</i> | C+I       |                                | C+I         |     |     | C+I          | C+I          | C+I          |           |

C= control group, I= Intervention group, SE= study entry
